# Supplementary material for: Do consultants do what they say they do? Observational study of the extent to which clinicians involve their patients in the decision-making process
Source: PubMed Central journal article supplement — BMJ Open. 2022 Jan 5;12(1):e056471. doi: 10.1136/bmjopen-2021-056471 (PMC8734018; doi:10.1136/bmjopen-2021-056471), 2022-01-05
Supplement: bmjopen-2021-056471.draft_revisions.pdf [file bmjopen-2021-056471.draft_revisions.pdf]

# BMJ Open

BMJ Open is committed to open peer review. As part of this commitment we make the peer review history of every article we publish publicly available.

When an article is published we post the peer reviewers' comments and the authors' responses online. We also post the versions of the paper that were used during peer review. These are the versions that the peer review comments apply to.

The versions of the paper that follow are the versions that were submitted during the peer review process. They are not the versions of record or the final published versions. They should not be cited or distributed as the published version of this manuscript.

BMJ Open is an open access journal and the full, final, typeset and author-corrected version of record of the manuscript is available on our site with no access controls, subscription charges or pay-per-view fees (<http://bmjopen.bmj.com>).

If you have any questions on BMJ Open's open peer review process please email [info.bmjopen@bmj.com](mailto:info.bmjopen@bmj.com)

# BMJ Open

## Do consultants do what they say they do? An analysis of patient involvement in video-taped encounters between consultants and patients.

|                               |                                                                                                                                                                                                                                                                                           |
|-------------------------------|-------------------------------------------------------------------------------------------------------------------------------------------------------------------------------------------------------------------------------------------------------------------------------------------|
| Journal:                      | <i>BMJ Open</i>                                                                                                                                                                                                                                                                           |
| Manuscript ID                 | bmjopen-2021-056471                                                                                                                                                                                                                                                                       |
| Article Type:                 | Original research                                                                                                                                                                                                                                                                         |
| Date Submitted by the Author: | 16-Aug-2021                                                                                                                                                                                                                                                                               |
| Complete List of Authors:     | Driever, Ellen; Isala Hospitals, Innovation and research<br>Stiggelbout, Anne; Leiden University Medical Center, Medical Decision Making<br>Brand, Paul; Isala klinieken, Princess Amalia Children's Centre;<br>University Medical Centre Groningen, UMCG Postgraduate School of Medicine |
| Keywords:                     | GENERAL MEDICINE (see Internal Medicine), MEDICAL EDUCATION & TRAINING, HEALTH SERVICES ADMINISTRATION & MANAGEMENT, MEDICAL ETHICS                                                                                                                                                       |
|                               |                                                                                                                                                                                                                                                                                           |

SCHOLARONE™  
Manuscripts

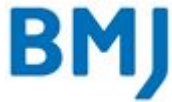

I, the Submitting Author has the right to grant and does grant on behalf of all authors of the Work (as defined in the below author licence), an exclusive licence and/or a non-exclusive licence for contributions from authors who are: i) UK Crown employees; ii) where BMJ has agreed a CC-BY licence shall apply, and/or iii) in accordance with the terms applicable for US Federal Government officers or employees acting as part of their official duties; on a worldwide, perpetual, irrevocable, royalty-free basis to BMJ Publishing Group Ltd ("BMJ") its licensees and where the relevant Journal is co-owned by BMJ to the co-owners of the Journal, to publish the Work in this journal and any other BMJ products and to exploit all rights, as set out in our [licence](#).

The Submitting Author accepts and understands that any supply made under these terms is made by BMJ to the Submitting Author unless you are acting as an employee on behalf of your employer or a postgraduate student of an affiliated institution which is paying any applicable article publishing charge ("APC") for Open Access articles. Where the Submitting Author wishes to make the Work available on an Open Access basis (and intends to pay the relevant APC), the terms of reuse of such Open Access shall be governed by a Creative Commons licence – details of these licences and which [Creative Commons](#) licence will apply to this Work are set out in our licence referred to above.

Other than as permitted in any relevant BMJ Author's Self Archiving Policies, I confirm this Work has not been accepted for publication elsewhere, is not being considered for publication elsewhere and does not duplicate material already published. I confirm all authors consent to publication of this Work and authorise the granting of this licence.

## Title page

### Title (Include study design)

Do consultants do what they say they do? An analysis of patient involvement in video-taped encounters between consultants and patients.

### Authors' names

Ellen M Driever (0000-0001-5644-4514), Anne M Stiggelbout (0000-0002-6293-4509), Paul LP Brand (0000-0002-1743-4193)

### Address for each author

Department of Innovation and Research, Isala Hospital, 8025 AB Zwolle, the Netherlands  
Ellen M Driever medical doctor, Department of Biomedical Data Sciences, Leiden University Medical Centre, 2333 ZA Leiden, the Netherlands Anne M Stiggelbout professor, Lifelong Learning Education and Assessment Research Network (LEARN) University Medical Centre Groningen, 9713 AV Groningen, the Netherlands Paul LP Brand professor and medical doctor.

**Correspondence to:** EM Driever Isala Academy, Department of Innovation and Research, Isala Hospital, Dokter van Heesweg 2, 8025 AB Zwolle, the Netherlands,  
[e.m.driever@isala.nl](mailto:e.m.driever@isala.nl)

### Contributor information

EMD designed the study, collected data, analysed data, and was the principal author of the manuscript. AMS assisted in the design of the study, the interpretation of the data, and the

1  
2  
3 editing of the manuscript. PLPB designed the study, supervised data analysis and  
4  
5 interpretation, and edited the manuscript. The corresponding author attests that all listed  
6  
7 authors meet authorship criteria and that no others meeting the criteria have been omitted.  
8  
9

### 10 11 12 **License for publication**

13  
14 We grant a worldwide license to the Publishers and its licensees in perpetuity, in all forms,  
15  
16 formats and media (whether known now or created in the future), to i) publish, reproduce,  
17  
18 distribute, display and store the Contribution, ii) translate the Contribution into other  
19  
20 languages, create adaptations, reprints, include within collections and create summaries,  
21  
22 extracts and/or, abstracts of the Contribution, iii) create any other derivative work(s) based on  
23  
24 the Contribution, iv) to exploit all subsidiary rights in the Contribution, v) the inclusion of  
25  
26 electronic links from the Contribution to third party material where-ever it may be located;  
27  
28 and, vi) license any third party to do any or all of the above.  
29  
30  
31  
32  
33  
34

### 35 **Conflict of interest**

36  
37 All authors have completed the ICMJE uniform disclosure form and declare no conflict of  
38  
39 interest; the grant from Isala Hospital Innovation and Research Fund covers the salary of the  
40  
41 main researcher (EMD) through her PhD trajectory; no financial relationships with any  
42  
43 organisations that might have an interest in the submitted work in the previous three years; no  
44  
45 other relationships or activities that could appear to have influenced the submitted work.  
46  
47  
48  
49  
50

### 51 **Data sharing statement**

52  
53 The data used and/or analysed during the current study are available from the corresponding  
54  
55 author on reasonable request.  
56  
57  
58  
59  
60

## Abstract

### Objectives

To assess consultants' ability to reliably judge their behaviour in reaching treatment decisions with their patients.

### Design

Cross-sectional analysis of hospital outpatient encounters, comparing consultants' self-reported usual decision-making style to their actual observed decision-making behaviour in video-recorded encounters.

### Setting

Large secondary care teaching hospital in the Netherlands.

### Participants

41 consultants from 18 disciplines and 781 patients.

### Primary and secondary outcome measure

With the control preference scale, the self-reported usual decision-making style was assessed (paternalistic, informative, or shared decisions making). Two independent raters assessed decision-making behaviour for each decision using the Observing Patient Involvement (OPTION)-5 instrument ranging from 0 (no SDM) to 100 (optimal SDM).

### Results

Consultants reported their usual decision-making style as informative (n=11), shared (n=16) and paternalistic (n=14). Overall, patient involvement was low, with mean (SD) OPTION<sup>5</sup>

1  
2  
3 scores of 16.8 (17.1). In an unadjusted multilevel analysis, the reported usual decision-  
4 making style was not related to the OPTION5 score ( $p>0.156$ ). After adjusting for patient,  
5 consultant and consultation characteristics, higher OPTION5 scores were only significantly  
6 related to the category of decisions (treatment versus the other categories) and to longer  
7 consultation duration ( $p<0.001$ ).  
8  
9  
10  
11  
12  
13  
14  
15  
16

### 17 Conclusions

18 The limited patient involvement that we observed was not associated with the consultants'  
19 self-reported usual decision-making style. Consultants appear to be unconsciously  
20 incompetent in shared decision making. This can hinder the transfer of this crucial  
21 communication skill to students and junior doctors.  
22  
23  
24  
25  
26  
27  
28  
29  
30

### 31 **Strengths and limitations of this study**

- 32  
33 • The main strength of our study was that we combined direct observations of consultants'  
34 SDM behaviour with their self-reported usual decision-making style in a large sample of  
35 routine clinical decisions across 18 different disciplines.  
36  
37
- 38 • The results of this study can be used to optimise health care professionals' SDM training  
39 and support further implementation of this crucial skill.  
40  
41
- 42 • The consultants were aware of being recorded, which may have affected their SDM  
43 behaviour.  
44  
45
- 46 • The cross-sectional design of this study precludes causal inference of the associations we  
47 observed.  
48  
49
- 50 • The study was performed in a single, large hospital in the Netherlands, which may have  
51 limited the generalizability of our results to other settings and countries.  
52  
53  
54  
55  
56  
57  
58  
59  
60

## Introduction

In Western societies, shared decision making (SDM) is increasingly championed by patients, clinician organizations and policy makers as the preferred model for making patient-centred healthcare decisions<sup>1-5</sup> and achieving value based health care.<sup>6</sup> The implementation of SDM in clinical practice, however, remains suboptimal.<sup>7-9</sup> Clinician-reported barriers to applying SDM include time constraints and the perceived incapability of patients to participate in decision making.<sup>10</sup> Advancing the implementation of SDM is also hindered by clinicians' perception that they already practise SDM.<sup>10, 11</sup> Several qualitative and quantitative studies in which clinicians were asked to report their usual decision-making style showed that clinicians feel that they already involve patients in decision making about their care.<sup>10-12</sup> This finding contradicts the results of a systematic review of 33 studies, which showed that the degree of patient involvement in actual medical decision making is low.<sup>7</sup> This raises the question of how reliable clinicians' judgments of their own decision-making behaviour are. This is important for several reasons. First, clinicians are role models for medical students and residents. They need to be aware of their role in the decision-making process and be competent in SDM to be able to demonstrate and teach this crucial communication skill to students and residents. Second, unreliable clinician self-reports of decision-making behaviours may undermine the accuracy and reliability of SDM research that is based on self-reported data. Third, the design of SDM training programs partly depends on participants' awareness of their SDM competency. Skills training may be particularly effective if participants are aware of their incompetence, become motivated to change their behaviour and are willing to repeatedly reflect on their behaviour when applying the newly acquired skill to become better at it.<sup>13</sup> To help advance the implementation of SDM and create awareness around personal biases, we sought to uncover/investigate a potential gap between clinicians' perceived and actual decision-making behaviour. Therefore, we studied how



1  
2  
3 reliable clinicians judge their behaviour in reaching treatment decisions with their patients.

4  
5 We compared their self-reported usual decision-making style with their actual decision-  
6  
7 making behaviour in hospital-based consultations.  
8  
9

## 10 11 12 **Methods**

13  
14  
15 We analysed video-recorded outpatient encounters between medical consultants and their  
16  
17 patients in Isala Hospital, a large general teaching hospital serving a population of  
18  
19 approximately 600 000 people in a mixed urban-rural area in the Netherlands. We used a  
20  
21 single camera with a fixed focus on the consultant only. The consultations were recorded  
22  
23 between November 2018 and April 2019.  
24  
25

### 26 27 28 **Participants and recruitment procedure**

29  
30 All participating medical consultants were recruited among participants of our previous  
31  
32 cross-sectional survey.<sup>11</sup> We aimed to include a minimum of 30 consultants and 10  
33  
34 encounters per consultant, which is a requirement for multilevel analysis of nested  
35  
36 observations at the level of the healthcare professional.<sup>14</sup> We enrolled consecutive outpatients  
37  
38 of the participating consultants. To protect the patients' anonymity, we only captured them on  
39  
40 audio. All participants, consultants and patients, provided written informed consent.  
41  
42  
43  
44  
45

### 46 47 **Coding**

#### 48 49 Usual style of decision making

50  
51 We obtained the participating consultants' perceptions of their usual style of decision making  
52  
53 in medical consultations from a cross-sectional survey among all clinicians of our hospital.  
54  
55 Their responses to a question assessing their usual decision-making role style were classified  
56  
57 as paternalistic (clinician decides), informative (patient decides) or shared decision making.<sup>11</sup>  
58  
59  
60

### Decision types

We distinguished the main decision – that related directly to the patient’s chief complaint – from all other decisions in each consultation. Then we categorised the main decisions into three decision types: diagnostic (gathering additional information), treatment and follow-up. We chose the consultants’ main decisions for our analyses because we assumed that they had taken their major decisions in mind when they reported their usual decision-making behaviour.

### Observed patient involvement

We used the validated Observing Patient Involvement (OPTION<sup>5</sup>) instrument to assess the extent to which consultants involved patients in the decision-making process (for the items see supplementary material, Table A).<sup>15</sup> Each OPTION<sup>5</sup> item is scored on a 5-point Likert scale ranging from 0 (not observed) to 4 (executed to a high standard). The sum of these items is the total score (range 0-20), which is rescaled to a range of 0-100.<sup>16</sup> Two trained researchers (EMD and RH) independently scored the first 29 videotaped encounters using the OPTION<sup>5</sup>. Then they compared and discussed scoring differences until consensus was reached. In the next step, they independently scored 179 subsequent encounters to assess inter-observer reliability. After we found good interrater agreement (intraclass correlation coefficient = 0.938), the remaining consultations were scored by one researcher.

### **Statistical analysis**

The OPTION<sup>5</sup> instrument is ordinal by design, which implies that nonparametric statistical analyses are required. In most studies, however, OPTION<sup>5</sup> scores have been analysed as a continuous variable using parametric statistical techniques.<sup>14</sup> Therefore, we assessed the

1  
2  
3 differences in OPTION<sup>5</sup> scores between groups using both nonparametric and parametric  
4  
5 analyses. Since these analyses showed comparable results and to facilitate comparison with  
6  
7 other studies, further data analysis was carried out using parametric tests only. Given the  
8  
9 nested nature of the data, with multiple observations for each participating consultant, we  
10  
11 selected multilevel modelling as the most appropriate method for analysis. We built random  
12  
13 intercept models, with the self-reported usual decision-making style as the predictor and the  
14  
15 OPTION<sup>5</sup> scores of the main decisions as outcomes. We adjusted for potential confounding  
16  
17 variables such as decision type, consultants' and patients' age and gender, consultation  
18  
19 duration, consultation type (new patient, or follow-up consultation) and discipline (medical,  
20  
21 surgical or supportive, as described earlier.<sup>17</sup> For all analyses, the alpha level was set at 0.05.  
22  
23 Univariate analyses were performed using SPSS (version 26). Multilevel analyses were  
24  
25 performed using MLWIN (version 3.04).  
26  
27  
28  
29  
30  
31  
32

### 33 **Patient and public involvement**

34  
35 Neither study participants nor the public were involved in the study design or data analysis.  
36  
37  
38  
39  
40  
41  
42  
43  
44  
45  
46  
47  
48  
49  
50  
51  
52  
53  
54  
55  
56  
57  
58  
59  
60

## Results

Forty-one consultants (28 males, 68%) participated in our study with a mean age (SD) of 47.9 (8.0) years, from 18 specialties (22 from medical and 19 from surgical disciplines). 14 participants had reported paternalistic decision making, 16 SDM, and 11 informative decision making as their usual decision-making style in our previous study.<sup>11</sup> In total, 781 patients (15-24 per consultant) participated in our study. After excluding 36 consultations for analysis because of insufficient audio quality and 18 preoperative anaesthesiology consultations in which no decisions were made, we analysed 1564 decisions from 727 consultations. The median (range) number of decisions per consultation was two (1-6). Of the 727 patients, 347 were male (48%), and the mean (SD) age was 48.6 (24.6) years. There were 239 consultations with new patients (33%) and 488 follow-up consultations (67%). The mean (SD) duration of the consultations was 15 (9) minutes, with a minimum of 1 and maximum of 50 minutes.

### OPTION<sup>5</sup> scores

Scores on the 5 items of the OPTION<sup>5</sup> (see supplementary material, Table A) were expressed on a scale ranging from 0 (no SDM) to 20 (optimal SDM) per item. The highest scores were found for item 1 (the consultant draws attention to, or confirms, that alternate management options exist, recognizing the need for a decision; mean (SD) score 5.1 (4.0)) and item 3 (the consultant gives information, or checks understanding, about the reasonable options that are available for the patient, including the choice of 'no action'; mean (SD) score 4.7 (5.0)).

Intermediate scores were found for item 4 (the consultant elicits the patient's preferred option(s); mean (SD) scores 3.3 (4.4)) and item 5 (the consultant makes an effort to integrate the patient's elicited preferences in the decision-making process; mean (SD) score 2.9 (4.1)).

The lowest scores were found for item 2 (the consultant supports the patient to become informed or deliberate about the options), mean (SD) score of 0.9 (2.4).

1  
2  
3 We found comparable results for nonparametric and parametric tests comparing OPTION<sup>5</sup>  
4 scores with consultants' self-reported usual decision-making style and with patient,  
5 consultant and consultation characteristics. Therefore, we only present parametric test results.  
6  
7  
8 The mean (SD) OPTION<sup>5</sup> score for the main decision was 16.8 (17.1). The OPTION<sup>5</sup> scores  
9  
10 varied both within and between consultants, see Figures 1 and 2. Univariate analysis showed  
11  
12 that the mean (SD) OPTION<sup>5</sup> scores on consultations of consultants who reported SDM (18.9  
13  
14 (17.3)) as their usual decision-making style were slightly higher than the mean scores on  
15  
16 consultations of consultants who reported an informative (15.6(17.9)) or paternalistic style of  
17  
18 decision making (15.0 (15.8),  $p = 0.016$ ). In an unadjusted multilevel analysis, the reported  
19  
20 usual decision-making style was not related to the OPTION<sup>5</sup> score ( $p > 0.156$ ). After adjusting  
21  
22 for patient, consultant and consultation characteristics, higher OPTION<sup>5</sup> scores were only  
23  
24 significantly related to the category of decisions (treatment versus the other categories) and  
25  
26 longer consultation duration. Table 1 presents the model that best fitted the data. The full  
27  
28 model including all patient and consultant characteristics is presented in the supplementary  
29  
30 material, Table B. This full model showed similar results but provided a poorer overall fit to  
31  
32 the data compared to the model presented in Table 1.  
33  
34  
35  
36  
37  
38  
39  
40  
41  
42

## 43 Discussion

44  
45 Using self-reported statements of usual decision-making style and an independent assessment  
46  
47 of consultants' actual decision-making behaviour in video-recorded consultations we sought  
48  
49 to investigate a potential gap between consultants' perceived and actual decision-making  
50  
51 behaviours in consultations. In a multilevel analysis of our data, the observed degree of  
52  
53 patient involvement in video-recorded consultations was not associated with the consultants'  
54  
55 self-reported usual decision-making style. Our results suggest that consultants are  
56  
57 unconsciously incompetent in SDM, which is important because they are the role models for  
58  
59  
60

1  
2  
3 medical students and junior doctors. To be able to demonstrate and teach this crucial  
4  
5 communication skill, consultants need to be aware of their role in the decision-making  
6  
7 process and be competent in SDM. To be receptive to SDM training, consultants need to be  
8  
9 consciously aware of their limited skills in involving patients in treatment decisions.  
10  
11

12 However, that only seemed to be the case for consultants who had reported paternalistic  
13  
14 decision making as their usual style. Furthermore, the discrepancy between consultants' self-  
15  
16 reported usual decision-making style and the observed patient involvement in their  
17  
18 consultations undermines the validity of SDM research using self-reported measures.  
19  
20  
21  
22

### 23 24 Comparison with other studies

25  
26 Patient involvement was limited, with mean OPTION<sup>5</sup> scores below the proposed cut-off  
27  
28 value of 25,<sup>7</sup> which is comparable to several other studies.<sup>9, 18</sup> We found considerable  
29  
30 differences in OPTION<sup>5</sup> scores between consultations of each individual consultant (Figure  
31  
32 2), suggesting that individual consultants' patient involvement behaviour is variable. Further  
33  
34 research is needed to explore the reasons for this variation, which could be related to  
35  
36 physician, patient or organizational factors. Limited patient involvement was associated with  
37  
38 decision type (treatment versus diagnostic or follow-up decisions) and longer consultation  
39  
40 duration (Table 1). The cross-sectional nature of our study did not allow us to identify what  
41  
42 the cause is and what the effect. (Lack of) time is often reported as a key barrier to the  
43  
44 application of SDM in clinical practice.<sup>10, 19-21</sup> The literature on the actual impact of applying  
45  
46 SDM on consultation duration is too scant to allow a clear estimation of the effects.<sup>21, 22</sup>  
47  
48  
49

50  
51 Patient and consultant characteristics such as age and gender were not related to the  
52  
53 OPTION<sup>5</sup> scores in the multilevel model (Table 1 and Table B in the supplementary  
54  
55 material). This is in accordance with a systematic review of 33 studies on OPTION<sup>5</sup> scores.<sup>7</sup>  
56  
57  
58  
59  
60

1  
2  
3 The previous literature comparing clinicians' self-reported and actual decision-making style  
4  
5 in medical consultations also showed that clinicians tend to overestimate the extent to which  
6  
7 they apply SDM.<sup>18, 23</sup> These studies analysed simple decisions in primary care such as refills  
8  
9 and routine testing<sup>18</sup> or were performed in specific breast cancer or renal failure clinics in  
10  
11 which the staff had been extensively trained in the application of SDM.<sup>23</sup>  
12  
13  
14  
15  
16

### 17 Strengths and limitations

18  
19 The main strength of our study was that we combined direct observations of consultants'  
20  
21 SDM behaviour in a large sample of routine clinical decisions across 18 different disciplines  
22  
23 with their self-reported usual decision-making style. We acknowledge the following  
24  
25 limitations of our study. Firstly, the consultants were aware of being recorded, which may  
26  
27 have prompted them to show more SDM behaviour than they otherwise would. However, so  
28  
29 far, there is no indication that videotaping consultations has an effect on clinicians'  
30  
31 behaviour.<sup>24, 25</sup> Secondly, the cross-sectional design of this study precludes causal inference  
32  
33 of the associations we observed. Thirdly, our study was performed in a single, large hospital  
34  
35 in the Netherlands, which may have limited the generalizability of our results to other settings  
36  
37 and countries.  
38  
39  
40  
41  
42  
43  
44

### 45 Conclusion and practical implications

46  
47 Our study shows that medical consultants are unable to reliably assess their own decision  
48  
49 making-behaviour in medical encounters. This undermines the validity of SDM research  
50  
51 using self-reported measures. Even more importantly, the consultants' unconscious  
52  
53 incompetence in SDM hampers transfer of this crucial communication skill to students and  
54  
55 junior doctors. In addition, consultants' motivation to participate in effective SDM training  
56  
57 programs<sup>26-28</sup> is likely to increase when they are consciously aware of their incompetence in  
58  
59  
60

1  
2  
3 practising SDM. Our results therefore support the use of video-recorded patient consultations  
4  
5 to help consultants regularly review, reflect on, and increase their awareness of their own  
6  
7 decision-making behaviours. This, in turn, may promote consultants' willingness to  
8  
9 participate in SDM training programs, which is necessary for further implementation of SDM  
10  
11 in clinical practice.  
12  
13  
14  
15  
16  
17  
18  
19  
20  
21  
22  
23  
24  
25  
26  
27  
28  
29  
30  
31  
32  
33  
34  
35  
36  
37  
38  
39  
40  
41  
42  
43  
44  
45  
46  
47  
48  
49  
50  
51  
52  
53  
54  
55  
56  
57  
58  
59  
60

For peer review only



### **Ethics statement**

The study was carried out in accordance with the Declaration of Helsinki and was approved by Isala Hospital's Ethical Review Board (file number 180706). All participants, consultants and patients, provided written informed consent.

### **Transparency statement**

The lead author (the manuscript's guarantor) affirms that the manuscript is an honest, accurate, and transparent account of the study being reported; that no important aspects of the study have been omitted; and that any discrepancies from the study as originally planned (and, if relevant, registered) have been explained.

### **Funding source**

This research was supported by a research grant from the Isala Hospital's Innovation and Research Fund (INO1602), they had no role in the study. We confirm the independence of researchers from funders and that all authors, external and internal, had full access to all of the data (including statistical reports and tables) in the study and can take responsibility for the integrity of the data and the accuracy of the data analysis is also required.

### **Acknowledgement**

We thank the consultants and the patients who participated in this study, and we thank T. Bouwkamp-Timmer for editorial help.

Figure 1. Mean patient involvement (OPTION<sup>5</sup>) of 41 medical consultants (with 727 patients) by self-reported usual decision-making style: paternalistic, shared and informative decision making.

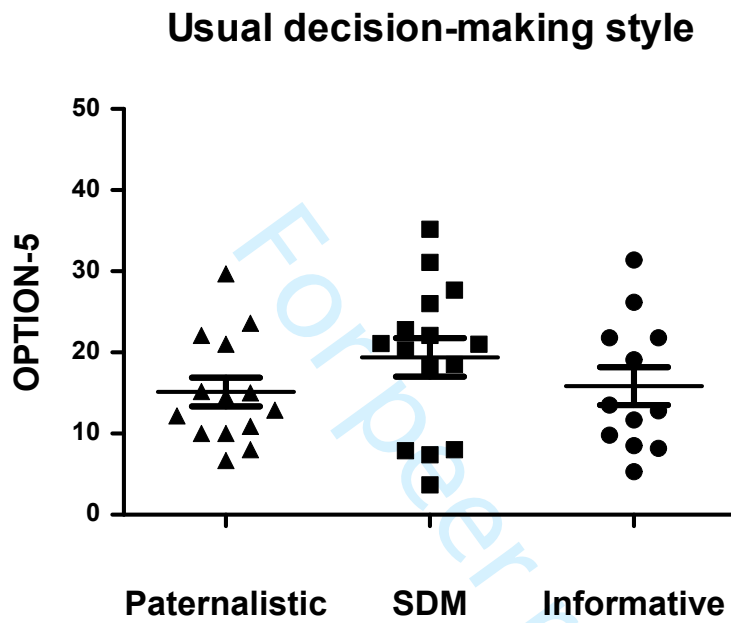

Figure 2. Mean and standard error of the mean of patient involvement (OPTION<sup>5</sup>) scores in consultation of 41 medical consultants (with 727 patients) by self-reported usual decision-making role: paternalistic, shared or informative decision making.

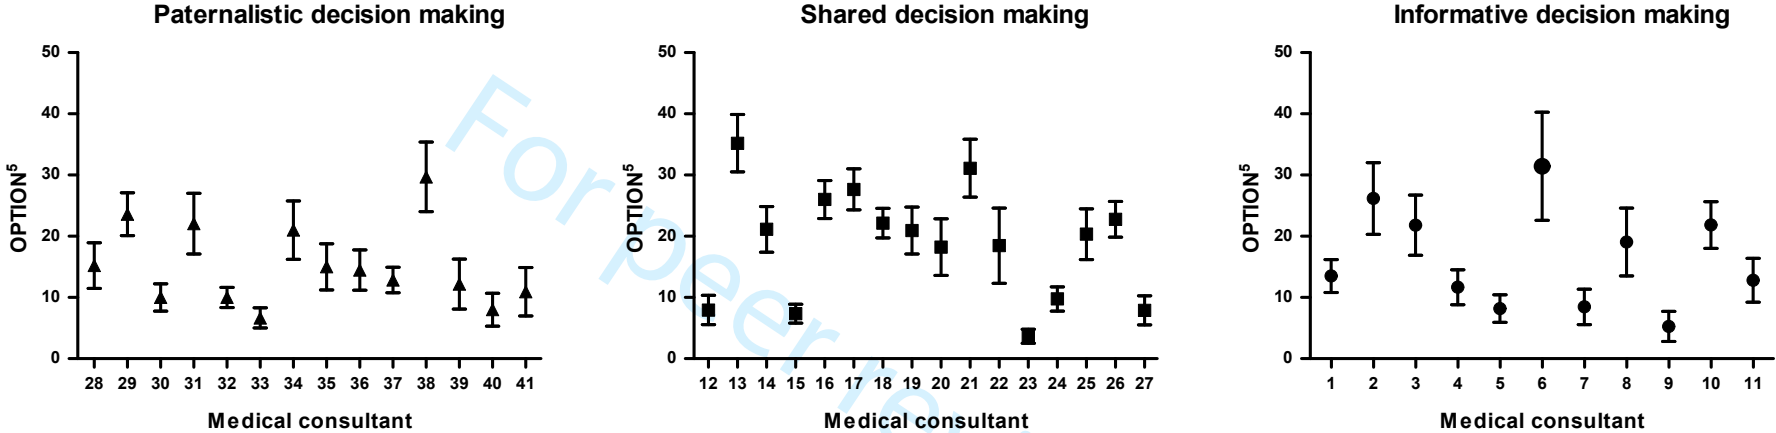

Table 1. Random-intercept regression models for the presence of patient involvement (OPTION-5) in 727 main decisions in encounters of 41 consultants with 727 patients.

| Variable                       |                       | Final model *    | p-value     |
|--------------------------------|-----------------------|------------------|-------------|
|                                |                       | Coefficient (SE) |             |
| Intercept †                    |                       | 19.17 (0.80)     | <0.001      |
| Consultant-level predictors    |                       |                  |             |
| Self-reported usual role<br>** | SDM                   | Reference        |             |
|                                | Paternalistic         | -1.60 (2.84)     | 0.573       |
|                                | Informative           | -1.13 (3.05)     | 0.712       |
| Patient-level predictors       |                       |                  |             |
| Decision category              | Treatment             | Reference        |             |
|                                | Diagnostic            | -5.59 (1.50)     | <0.001      |
|                                | Follow-up             | -10.34 (1.75)    | <0.001      |
|                                | Consultation duration | Minutes          | 0.73 (0.07) |

\* This final model fitted the data best. The model including all patient and consultant characteristics is presented in the supplementary material Table B. This full model showed similar results to the model presented in Table 1, but with lower overall fit.

† Intercept = The intercept can be interpreted as the average patient involvement of a (hypothetical) subject scoring 0 for each predictor in the model.

\*\* Self-reported usual decision-making role in previous study.<sup>11</sup>

## References

1. Van der Weijden T, Post H, Brand PLP, et al. Shared decision making, a buzz-word in the Netherlands, the pace quickens towards nationwide implementation. *Z Evid Fortbild Qual Gesundheitswes* 2017;123-124:69-74.
2. Stiggelbout AM, Pieterse AH, De Haes JC. Shared decision making: Concepts, evidence, and practice. *Patient Educ Couns* 2015;98:1172-9.
3. Blumenthal-Barby J, Opel DJ, Dickert NW, et al. Potential Unintended Consequences Of Recent Shared Decision Making Policy Initiatives. *Health Aff* 2019;38:1876-81.
4. Harter M, Moumjid N, Cornuz J, Elwyn G, van der Weijden T. Shared decision making in 2017: International accomplishments in policy, research and implementation. *Z Evid Fortbild Qual Gesundheitswes* 2017;123-124:1-5.
5. Carmona C, Crutwell J, Burnham M, Polak L, Guideline C. Shared decision-making: summary of NICE guidance. *BMJ* 2021;373:1430.
6. Spatz ES, Krumholz HM, Moulton BW. Prime Time for Shared Decision Making. *JAMA* 2017;317:1309-10.
7. Couet N, Desroches S, Robitaille H, et al. Assessments of the extent to which health-care providers involve patients in decision making: a systematic review of studies using the OPTION instrument. *Health Expect* 2015;18:542-61.
8. Agbadje TT, Elidor H, Perin MS, Adekpedjou R, Legare F. Towards a taxonomy of behavior change techniques for promoting shared decision making. *Implement Sci* 2020;15:67.
9. Meijers MC, Noordman J, Spreuwenberg P, Olde Hartman TC, van Dulmen S. Shared decision-making in general practice: an observational study comparing 2007 with 2015. *Fam Pract* 2019;36:357-64.
10. Joseph-Williams N, Lloyd A, Edwards A, et al. Implementing shared decision making in the NHS: lessons from the MAGIC programme. *BMJ* 2017;357:1744.
11. Driever EM, Stiggelbout AM, Brand PLP. Shared decision making: Physicians' preferred role, usual role and their perception of its key components. *Patient Educ Couns* 2020;103:77-82.
12. Pollard S, Bansback N, Bryan S. Physician attitudes toward shared decision making: A systematic review. *Patient Educ Couns* 2015;98:1046-57.
13. Ericsson KA. Deliberate practice and acquisition of expert performance: a general overview. *Acad Emerg Med* 2008;15:988-94.
14. De Leeuw JME. Introduction to Multilevel Analysis. *Handbook of multilevel analysis*. New York, USA: Springer Science + Business Media 2008.
15. Elwyn G, Hutchings H, Edwards A, et al. The OPTION scale: measuring the extent that clinicians involve patients in decision-making tasks. *Health Expect* 2005;8:34-42.
16. Glyn Elwyn SWG, Paul Barr. Observer OPTION-5 Manual. Measuring shared decision making by assessing recordings or transcripts of encounters from clinical settings. The Dartmouth Institute for Health Policy and Clinical Practice 2018.
17. Dijkstra IS, Pols J, Remmelts P, Bakker B, Mooij JJ, Borleffs JC, et al. What are we preparing them for? Development of an inventory of tasks for medical, surgical and supportive specialties. *MedTeach* 2013;35:1068-77.
18. Jackson JL, Storch D, Jackson W, Becher D, O'Malley PG. Direct-Observation Cohort Study of Shared Decision Making in a Primary Care Clinic. *Med Decis Making* 2020;40:756-65.
19. Legare F, Thompson-Leduc P. Twelve myths about shared decision making. *Patient Educ Couns* 2014;96:281-6.
20. Pieterse AH, Stiggelbout AM, Montori VM. Shared Decision Making and the Importance of Time. *JAMA* 2019;322:25-6.
21. Sondergaard SR, Madsen PH, Hilberg O, et al. The impact of shared decision making on time consumption and clinical decisions. A prospective cohort study. *Patient Educ Couns* 2020;1560-1567.
22. Dobler CC, Sanchez M, Gionfriddo MR, et al. Impact of decision aids used during clinical encounters on clinician outcomes and consultation length: a systematic review. *BMJ Qual Saf* 2019;28:499-510.

- 1  
2  
3 23. Williams D, Edwards A, Wood F, et al. Ability of observer and self-report measures to  
4 capture shared decision-making in clinical practice in the UK: a mixed-methods study. *BMJ Open*  
5 2019;9:029485.  
6 24. Arborelius E, Timpka T. In what way may videotapes be used to get significant information  
7 about the patient-physician relationship? *Med Teach* 1990;12:197-208.  
8 25. Pringle M, Stewart-Evans C. Does awareness of being video recorded affect doctors'  
9 consultation behaviour? *Br J Gen Pract* 1990;40:455-8.  
10 26. Henselmans I, Brugel SD, de Haes H, et al. Promoting shared decision making in advanced  
11 cancer: Development and piloting of a patient communication aid. *Patient Educ Couns* 2019;102:916-  
12 23.  
13 27. Geiger F, Liethmann K, Reitz D, Galalae R, Kasper J. Efficacy of the doktormitSDM training  
14 module in supporting shared decision making - Results from a multicenter double-blind randomized  
15 controlled trial. *Patient Educ Couns* 2017;100:2331-8.  
16 28. Van Veenendaal H, Voogdt-Pruis H, Ubbink DT, Hilders C. Effect of a multilevel  
17 implementation programme on shared decision-making in breast cancer care. *BJS Open* 2021;5.  
18  
19  
20  
21  
22  
23  
24  
25  
26  
27  
28  
29  
30  
31  
32  
33  
34  
35  
36  
37  
38  
39  
40  
41  
42  
43  
44  
45  
46  
47  
48  
49  
50  
51  
52  
53  
54  
55  
56  
57  
58  
59  
60

### Supplementary material

Table A. Observing Patient Involvement (OPTION)-5 scale to assess the extent to which physicians involve patients in decision making.<sup>16</sup>

| Item | Content                                                                                                                                                                                                                                                                                                                                         |
|------|-------------------------------------------------------------------------------------------------------------------------------------------------------------------------------------------------------------------------------------------------------------------------------------------------------------------------------------------------|
| 1    | For the health issue being discussed, the clinician draws attention to or confirms that alternate treatment or management options exist or that the need for a decision exists. If the patient rather than the clinician draws attention to the availability of options, the clinician responds by agreeing that the options need deliberation. |
| 2    | The clinician reassures the patient or re-affirms that the clinician will support the patient to become informed or deliberate about the options. If the patient states that they have sought or obtained information prior to the encounter, the clinician supports such a deliberation process.                                               |
| 3    | The clinician gives information or checks understanding about the options that are considered reasonable (this can include taking no action), to support the patient in comparing alternatives. If the patient requests clarification, the clinician supports the process.                                                                      |
| 4    | The clinician makes an effort to elicit the patient's preferences in response to the options that have been described. If the patient declares their preference(s), the clinician is supportive.                                                                                                                                                |
| 5    | The clinician makes an effort to integrate the patient's elicited preferences as decisions are made. If the patient indicates how best to integrate their preferences as decisions are made, the clinician makes an effort to do so.                                                                                                            |

Table B. Random-intercept regression models for the presence of patient involvement (OPTION<sup>5</sup>) in 727 main decisions in encounters of 41 consultants with 727 patients.

| Variable                    |               | Full model* (N=1564)<br>Coefficient (SE) | p-value |
|-----------------------------|---------------|------------------------------------------|---------|
| Intercept†                  |               | 19.17 (2.41)                             | <0.001  |
| Consultant-level predictors |               |                                          |         |
| Reported usual role**       | SDM           | Reference                                |         |
|                             | Paternalistic | -1.37 (2.87)                             | 0.634   |
|                             | Informative   | -1.48 (3.11)                             | 0.633   |
| Age                         | Years         | -0.14 (0.16)                             | 0.383   |
| Gender                      | Male          | Reference                                |         |
|                             | Women         | -3.11 (2.67)                             | 0.243   |
| Discipline                  | Medical       | Reference                                |         |
|                             | Surgical      | 1.89 (2.55)                              | 0.457   |
| Patient-level predictors    |               |                                          |         |
| Age                         | Years         | -0.03 (0.03)                             | 0.270   |
| Gender                      | Male          | Reference                                |         |
|                             | Women         | 0.62 (1.09)                              | 0.569   |
| Type of consultation        | New patient   | Reference                                |         |
|                             | Follow-up     | 0.05 (1.30)                              | 0.969   |
| Time of consultation        | Minutes       | 0.74 (0.08)                              | <0.001  |
| Decision category decision  | Treatment     | Reference                                |         |
|                             | Diagnostic    | -5.61 (1.52)                             | <0.001  |
|                             | Follow-up     | -10.18 (1.75)                            | <0.001  |

\* This full model, with patients' and consultants' characteristics showed similar results to the final model presented in Table 1, but with lower overall fit.

† Intercept = The intercept can be interpreted as the average patient involvement of a (hypothetical) subject scoring 0 for each predictor in the model.

\*\* Self-reported usual decision-making role in previous study.<sup>11</sup>



STROBE Statement—Checklist of items that should be included in reports of *cross-sectional studies*

|                              | Item No | Recommendation                                                                                                                                                                                               | Page No |
|------------------------------|---------|--------------------------------------------------------------------------------------------------------------------------------------------------------------------------------------------------------------|---------|
| <b>Title and abstract</b>    | 1       | (a) Indicate the study's design with a commonly used term in the title or the abstract                                                                                                                       | 1       |
|                              |         | (b) Provide in the abstract an informative and balanced summary of what was done and what was found                                                                                                          | 3-4     |
| <b>Introduction</b>          |         |                                                                                                                                                                                                              |         |
| Background/rationale         | 2       | Explain the scientific background and rationale for the investigation being reported                                                                                                                         | 5       |
| Objectives                   | 3       | State specific objectives, including any prespecified hypotheses                                                                                                                                             | 5-6     |
| <b>Methods</b>               |         |                                                                                                                                                                                                              |         |
| Study design                 | 4       | Present key elements of study design early in the paper                                                                                                                                                      | 6       |
| Setting                      | 5       | Describe the setting, locations, and relevant dates, including periods of recruitment, exposure, follow-up, and data collection                                                                              | 6       |
| Participants                 | 6       | (a) Give the eligibility criteria, and the sources and methods of selection of participants                                                                                                                  | 6       |
| Variables                    | 7       | Clearly define all outcomes, exposures, predictors, potential confounders, and effect modifiers. Give diagnostic criteria, if applicable                                                                     | 6-7     |
| Data sources/<br>measurement | 8*      | For each variable of interest, give sources of data and details of methods of assessment (measurement). Describe comparability of assessment methods if there is more than one group                         | 7-8     |
| Bias                         | 9       | Describe any efforts to address potential sources of bias                                                                                                                                                    | 8       |
| Study size                   | 10      | Explain how the study size was arrived at                                                                                                                                                                    | 6       |
| Quantitative variables       | 11      | Explain how quantitative variables were handled in the analyses. If applicable, describe which groupings were chosen and why                                                                                 | 8       |
| Statistical methods          | 12      | (a) Describe all statistical methods, including those used to control for confounding                                                                                                                        | 8       |
|                              |         | (b) Describe any methods used to examine subgroups and interactions                                                                                                                                          | 8       |
|                              |         | (c) Explain how missing data were addressed                                                                                                                                                                  | 8       |
|                              |         | (d) If applicable, describe analytical methods taking account of sampling strategy                                                                                                                           | 8       |
|                              |         | (e) Describe any sensitivity analyses                                                                                                                                                                        | 8       |
| <b>Results</b>               |         |                                                                                                                                                                                                              |         |
| Participants                 | 13*     | (a) Report numbers of individuals at each stage of study—eg numbers potentially eligible, examined for eligibility, confirmed eligible, included in the study, completing follow-up, and analysed            | 9       |
|                              |         | (b) Give reasons for non-participation at each stage                                                                                                                                                         | -       |
|                              |         | (c) Consider use of a flow diagram                                                                                                                                                                           | -       |
| Descriptive data             | 14*     | (a) Give characteristics of study participants (eg demographic, clinical, social) and information on exposures and potential confounders                                                                     | 9       |
|                              |         | (b) Indicate number of participants with missing data for each variable of interest                                                                                                                          | -       |
| Outcome data                 | 15*     | Report numbers of outcome events or summary measures                                                                                                                                                         | 9       |
| Main results                 | 16      | (a) Give unadjusted estimates and, if applicable, confounder-adjusted estimates and their precision (eg, 95% confidence interval). Make clear which confounders were adjusted for and why they were included | 9-10    |

|                          |    |                                                                                                                                                                            |       |
|--------------------------|----|----------------------------------------------------------------------------------------------------------------------------------------------------------------------------|-------|
|                          |    | (b) Report category boundaries when continuous variables were categorized                                                                                                  | -     |
|                          |    | (c) If relevant, consider translating estimates of relative risk into absolute risk for a meaningful time period                                                           | -     |
| Other analyses           | 17 | Report other analyses done—eg analyses of subgroups and interactions, and sensitivity analyses                                                                             | 10    |
| <b>Discussion</b>        |    |                                                                                                                                                                            |       |
| Key results              | 18 | Summarise key results with reference to study objectives                                                                                                                   | 10-11 |
| Limitations              | 19 | Discuss limitations of the study, taking into account sources of potential bias or imprecision. Discuss both direction and magnitude of any potential bias                 | 12    |
| Interpretation           | 20 | Give a cautious overall interpretation of results considering objectives, limitations, multiplicity of analyses, results from similar studies, and other relevant evidence | 12-13 |
| Generalisability         | 21 | Discuss the generalisability (external validity) of the study results                                                                                                      | 12    |
| <b>Other information</b> |    |                                                                                                                                                                            |       |
| Funding                  | 22 | Give the source of funding and the role of the funders for the present study and, if applicable, for the original study on which the present article is based              | 14    |

\*Give information separately for exposed and unexposed groups.

**Note:** An Explanation and Elaboration article discusses each checklist item and gives methodological background and published examples of transparent reporting. The STROBE checklist is best used in conjunction with this article (freely available on the Web sites of PLoS Medicine at <http://www.plosmedicine.org/>, Annals of Internal Medicine at <http://www.annals.org/>, and Epidemiology at <http://www.epidem.com/>). Information on the STROBE Initiative is available at [www.strobe-statement.org](http://www.strobe-statement.org).

# BMJ Open

**Do consultants do what they say they do? Observational study of the extent to which clinicians involve their patients in the decision-making process.**

|                                 |                                                                                                                                                                                                                                                                                        |
|---------------------------------|----------------------------------------------------------------------------------------------------------------------------------------------------------------------------------------------------------------------------------------------------------------------------------------|
| Journal:                        | <i>BMJ Open</i>                                                                                                                                                                                                                                                                        |
| Manuscript ID                   | bmjopen-2021-056471.R1                                                                                                                                                                                                                                                                 |
| Article Type:                   | Original research                                                                                                                                                                                                                                                                      |
| Date Submitted by the Author:   | 02-Nov-2021                                                                                                                                                                                                                                                                            |
| Complete List of Authors:       | Driever, Ellen; Isala Hospitals, Innovation and research<br>Stiggelbout, Anne; Leiden University Medical Center, Medical Decision Making<br>Brand, Paul; Isala klinieken, Princess Amalia Children's Centre; University Medical Centre Groningen, UMCG Postgraduate School of Medicine |
| <b>Primary Subject Heading</b>: | Medical education and training                                                                                                                                                                                                                                                         |
| Secondary Subject Heading:      | Communication, Medical education and training                                                                                                                                                                                                                                          |
| Keywords:                       | GENERAL MEDICINE (see Internal Medicine), MEDICAL EDUCATION & TRAINING, HEALTH SERVICES ADMINISTRATION & MANAGEMENT, MEDICAL ETHICS                                                                                                                                                    |
|                                 |                                                                                                                                                                                                                                                                                        |

SCHOLARONE™  
Manuscripts



I, the Submitting Author has the right to grant and does grant on behalf of all authors of the Work (as defined in the below author licence), an exclusive licence and/or a non-exclusive licence for contributions from authors who are: i) UK Crown employees; ii) where BMJ has agreed a CC-BY licence shall apply, and/or iii) in accordance with the terms applicable for US Federal Government officers or employees acting as part of their official duties; on a worldwide, perpetual, irrevocable, royalty-free basis to BMJ Publishing Group Ltd ("BMJ") its licensees and where the relevant Journal is co-owned by BMJ to the co-owners of the Journal, to publish the Work in this journal and any other BMJ products and to exploit all rights, as set out in our [licence](#).

The Submitting Author accepts and understands that any supply made under these terms is made by BMJ to the Submitting Author unless you are acting as an employee on behalf of your employer or a postgraduate student of an affiliated institution which is paying any applicable article publishing charge ("APC") for Open Access articles. Where the Submitting Author wishes to make the Work available on an Open Access basis (and intends to pay the relevant APC), the terms of reuse of such Open Access shall be governed by a Creative Commons licence – details of these licences and which [Creative Commons](#) licence will apply to this Work are set out in our licence referred to above.

Other than as permitted in any relevant BMJ Author's Self Archiving Policies, I confirm this Work has not been accepted for publication elsewhere, is not being considered for publication elsewhere and does not duplicate material already published. I confirm all authors consent to publication of this Work and authorise the granting of this licence.

## Title page

### Title

Do consultants do what they say they do? Observational study of the extent to which clinicians involve their patients in the decision-making process.

### Authors' names

Ellen M Driever (0000-0001-5644-4514), Anne M Stiggelbout (0000-0002-6293-4509), Paul LP Brand (0000-0002-1743-4193)

### Address for each author

Department of Innovation and Research, Isala Hospital, 8025 AB Zwolle, the Netherlands  
Ellen M Driever medical doctor, Department of Biomedical Data Sciences, Leiden University Medical Centre, 2333 ZA Leiden, the Netherlands Anne M Stiggelbout professor, Lifelong Learning Education and Assessment Research Network (LEARN) University Medical Centre Groningen, 9713 AV Groningen, the Netherlands Paul LP Brand professor and medical doctor.

**Correspondence to:** EM Driever Isala Academy, Department of Innovation and Research, Isala Hospital, Dokter van Heesweg 2, 8025 AB Zwolle, the Netherlands,  
[e.m.driever@isala.nl](mailto:e.m.driever@isala.nl)

### Contributor information

EMD designed the study, collected data, analysed data, and was the principal author of the manuscript. AMS assisted in the design of the study, the interpretation of the data, and the editing of the manuscript. PLPB designed the study, supervised data analysis and

1  
2  
3 interpretation, and edited the manuscript. The corresponding author attests that all listed  
4  
5 authors meet authorship criteria and that no others meeting the criteria have been omitted.  
6  
7  
8  
9

### 10 **License for publication**

11  
12 We grant a worldwide license to the Publishers and its licensees in perpetuity, in all forms,  
13  
14 formats and media (whether known now or created in the future), to i) publish, reproduce,  
15  
16 distribute, display and store the Contribution, ii) translate the Contribution into other  
17  
18 languages, create adaptations, reprints, include within collections and create summaries,  
19  
20 extracts and/or, abstracts of the Contribution, iii) create any other derivative work(s) based on  
21  
22 the Contribution, iv) to exploit all subsidiary rights in the Contribution, v) the inclusion of  
23  
24 electronic links from the Contribution to third party material where-ever it may be located;  
25  
26 and, vi) license any third party to do any or all of the above.  
27  
28  
29  
30  
31  
32

### 33 **Conflict of interest**

34  
35 All authors have completed the ICMJE uniform disclosure form and declare no conflict of  
36  
37 interest; the grant from Isala Hospital Innovation and Research Fund covers the salary of the  
38  
39 main researcher (EMD) through her PhD trajectory; no financial relationships with any  
40  
41 organisations that might have an interest in the submitted work in the previous three years; no  
42  
43 other relationships or activities that could appear to have influenced the submitted work.  
44  
45  
46  
47  
48

### 49 **Data sharing statement**

50  
51 The data used and/or analysed during the current study are available from the corresponding  
52  
53 author on reasonable request.  
54  
55  
56  
57

### 58 **Abstract**

## Objectives

To assess whether consultants do what they say they do in reaching decisions with their patients.

## Design

Cross-sectional analysis of hospital outpatient encounters, comparing consultants' self-reported usual decision-making style to their actual observed decision-making behaviour in video-recorded encounters.

## Setting

Large secondary care teaching hospital in the Netherlands.

## Participants

41 consultants from 18 disciplines and 781 patients.

## Primary and secondary outcome measure

With the control preference scale, the self-reported usual decision-making style was assessed (paternalistic, informative, or shared decision making). Two independent raters assessed decision-making behaviour for each decision using the Observing Patient Involvement (OPTION)<sup>5</sup> instrument ranging from 0 (no SDM) to 100 (optimal SDM).

## Results

Consultants reported their usual decision-making style as informative (n=11), shared (n=16) and paternalistic (n=14). Overall, patient involvement was low, with mean (SD) OPTION<sup>5</sup> scores of 16.8 (17.1). In an unadjusted multilevel analysis, the reported usual decision-

1  
2  
3 making style was not related to the OPTION<sup>5</sup> score ( $p>0.156$ ). After adjusting for patient,  
4  
5 consultant and consultation characteristics, higher OPTION<sup>5</sup> scores were only significantly  
6  
7 related to the category of decisions (treatment versus the other categories) and to longer  
8  
9 consultation duration ( $p<0.001$ ).  
10  
11  
12  
13

### 14 Conclusions

15  
16 The limited patient involvement that we observed was not associated with the consultants'  
17  
18 self-reported usual decision-making style. Consultants appear to be unconsciously  
19  
20 incompetent in shared decision making. This can hinder the transfer of this crucial  
21  
22 communication skill to students and junior doctors.  
23  
24  
25  
26  
27

### 28 **Strengths and limitations of this study**

- 29  
30
- 31 • The main strength of our study was that we combined direct observations of consultants'  
32  
33 SDM behaviour with their self-reported usual decision-making style in a large sample of  
34  
35 clinical decisions across 18 different disciplines.  
36  
37
  - 38 • The results of this study can be used to optimise health care professionals' SDM training  
39  
40 and support further implementation of this crucial skill.  
41  
42
  - 43 • The consultants were aware of being recorded, which may have affected their SDM  
44  
45 behaviour.  
46  
47
  - 48 • The cross-sectional design of this study precludes causal inference of the associations we  
49  
50 observed.  
51  
52
  - 53 • The study was performed in a single, large hospital in the Netherlands, which may have  
54  
55 limited the generalizability of our results to other settings and countries.  
56  
57  
58  
59  
60



## Introduction

In Western societies, shared decision making (SDM) is increasingly championed by patients, clinician organizations and policy makers as the preferred model for making patient-centred healthcare decisions<sup>1-5</sup> and achieving value based health care.<sup>6</sup> The implementation of SDM in clinical practice, however, remains suboptimal.<sup>7-9</sup> Clinician-reported barriers to applying SDM include time constraints and the perceived incapability of patients to participate in decision making.<sup>10</sup> Advancing the implementation of SDM is also hindered by clinicians' perception that they already practise SDM.<sup>10, 11</sup> Several qualitative and quantitative studies in which clinicians were asked to report their usual decision-making style showed that clinicians feel that they already involve patients in decision making about their care.<sup>10-12</sup> This finding contradicts the results of a systematic review of 33 studies, which showed that the degree of patient involvement in actual medical decision making is low.<sup>7</sup> This raises the question of how accurate clinicians' judgments of their own decision-making behaviour are. This is important for several reasons. First, clinicians are role models for medical students and residents. They need to be aware of their role in the decision-making process and be competent in SDM to be able to demonstrate and teach this crucial communication skill to students and residents. Second, unreliable clinician self-reports of decision-making behaviours may undermine the accuracy and reliability of SDM research that is based on self-reported data. Third, the design of SDM training programs partly depends on participants' awareness of their SDM competency. Skills training may be particularly effective if participants are aware of their incompetence, become motivated to change their behaviour and are willing to repeatedly reflect on their behaviour when applying the newly acquired skill to become better at it.<sup>13</sup> To help advance the implementation of SDM and create awareness around personal biases, we sought to uncover/investigate a potential gap between clinicians' perceived and actual decision-making behaviour. Therefore, we studied whether

1  
2  
3 consultants do what they say they do in reaching decisions with their patients. We compared  
4  
5 their self-reported usual decision-making style with their actual decision-making behaviour in  
6  
7 hospital-based consultations.  
8  
9

## 10 11 12 **Methods**

13  
14  
15 We analysed video-recorded outpatient encounters between medical consultants and their  
16  
17 patients in Isala Hospital, a large general teaching hospital serving a population of  
18  
19 approximately 600 000 people in a mixed urban-rural area in the Netherlands. We used a  
20  
21 single camera with a fixed focus on the consultant only. The consultations were recorded  
22  
23 between November 2018 and April 2019.  
24  
25  
26  
27  
28

### 29 **Participants and recruitment procedure**

30  
31 All participating medical consultants were recruited among participants of our previous  
32  
33 cross-sectional survey.<sup>11</sup> The consultants were invited via e-mail by the main researcher  
34  
35 (EMD) to participate in this observational study of video-taped encounters. There was no  
36  
37 working relationship or power relation between the researchers and the consultants who were  
38  
39 invited and we made it clear in the information for participants that participation was  
40  
41 voluntary. Participants were not recruited based on specific characteristics.  
42  
43  
44  
45  
46

47 We aimed to include a minimum of 30 consultants and 10 encounters per consultant, which is  
48  
49 a requirement for multilevel analysis of nested observations at the level of the healthcare  
50  
51 professional.<sup>14</sup> We enrolled consecutive outpatients of the participating consultants. To  
52  
53 protect the patients' anonymity, we only captured them on audio. All participants, consultants  
54  
55 and patients, provided written informed consent.  
56  
57  
58  
59  
60

## Coding

### Usual style of decision making

In our previous study, we obtained the participating consultants' perceptions of their usual style of medical decision making with the modified Control Preference Scale (CPS). Their responses to the CPS questions, were classified as paternalistic (clinician decides), informative (patient decides) or shared decision making.<sup>11</sup>

### Decision types

Two researchers (EMD and RH) distinguished the main decision from all other decisions in a consultation (decision type). The main decision was defined as the decision that was directly related to the patient's chief complaint as expressed during the consultation. Differences in decision type classification between researchers were resolved by discussion with an independent third researcher (PLPB) and consensus. Then we categorised the main decisions into three decision types: diagnostic (gathering additional information), treatment and follow-up. We chose the consultants' main decisions for our analyses because we assumed that they had the major decisions in mind when they reported their usual decision-making behaviour.

### Observed patient involvement

Several instruments are available to assess SDM in medical consultations. The OPTION scale, developed by Elwyn and colleagues assesses the extent to which consultants involve patients in the decision-making process (for the items see supplementary material, Table A).<sup>15</sup> This instrument has been used frequently in SDM research. Because it focuses on clinician behavior, it appeared suitable for our research question. The OPTION<sup>5</sup> is the validated concise version of the OPTION instrument<sup>15</sup> and is considered to be more efficient with lower cognitive burden for raters than the original 12-item instrument<sup>16</sup> Following the

1  
2  
3 OPTION5 manual, each item was scored on a Likert-scale ranging from 0 (no effort) to 4  
4 (exemplary effort). Following recommendation of the OPTION5 scoring manual, these items  
5 were rescaled by a factor 5 (resulting in items scores ranging from 0 to 20, and total scores  
6 ranging from 0 to 100.<sup>17</sup> Two trained researchers (EMD, a medical doctor and RH, a  
7 linguistics master student) independently scored the first 29 videotaped encounters using the  
8 OPTION<sup>5</sup>. Then they compared and discussed scoring differences until consensus was  
9 reached. In the next step, they independently scored 179 subsequent encounters to assess  
10 inter-observer reliability. After we found good interrater agreement (intraclass correlation  
11 coefficient = 0.938), the remaining consultations were scored by one researcher.  
12  
13  
14  
15  
16  
17  
18  
19  
20  
21  
22  
23  
24  
25

### 26 **Statistical analysis**

27  
28 The OPTION<sup>5</sup> instrument is ordinal by design, which implies that nonparametric statistical  
29 analyses are required. In most studies, however, OPTION<sup>5</sup> scores have been analysed as a  
30 continuous variable using parametric statistical techniques.<sup>14</sup> Therefore, we assessed the  
31 differences in OPTION<sup>5</sup> scores between groups using both nonparametric and parametric  
32 analyses. Since these analyses showed comparable results and to facilitate comparison with  
33 other studies, further data analysis was carried out using parametric tests only. Given the  
34 nested nature of the data, with multiple observations for each participating consultant, we  
35 selected multilevel modelling as the most appropriate method for analysis. We built random  
36 intercept models, with the self-reported usual decision-making style as the predictor and the  
37 OPTION<sup>5</sup> scores of the main decisions as outcomes. We adjusted for potential confounding  
38 variables such as decision type, consultants' and patients' age and gender, consultation  
39 duration, consultation type (new patient, or follow-up consultation) and discipline (medical,  
40 or surgical, as described earlier.<sup>18</sup> For all analyses, the alpha level was set at 0.05. Univariate  
41  
42  
43  
44  
45  
46  
47  
48  
49  
50  
51  
52  
53  
54  
55  
56  
57  
58  
59  
60

1  
2  
3 analyses were performed using SPSS (version 26). Multilevel analyses were performed using  
4  
5 MLWIN (version 3.04).  
6  
7  
8  
9

### 10 **Patient and public involvement**

11  
12 Neither study participants nor the public were involved in the study design or data analysis.  
13  
14  
15  
16  
17  
18  
19  
20  
21  
22  
23  
24  
25  
26  
27  
28  
29  
30  
31  
32  
33  
34  
35  
36  
37  
38  
39  
40  
41  
42  
43  
44  
45  
46  
47  
48  
49  
50  
51  
52  
53  
54  
55  
56  
57  
58  
59  
60

For peer review only

## Results

Forty-one consultants (28 males, 68%) participated in our study with a mean age (SD) of 47.9 (8.0) years, from 18 specialties (23 from medical and 18 from surgical discipline, see supplementary Table B). 14 participants had reported paternalistic decision making, 16 SDM, and 11 informative decision making as their usual decision-making style in our previous study.<sup>11</sup> In total, 781 patients (15-24 per consultant) participated in our study. After excluding 36 consultations from the analysis because of insufficient audio quality and 18 preoperative anaesthesiology consultations in which no decisions were made, we analysed 1564 decisions from 727 consultations. The median (range) number of decisions per consultation was two (1-6). Of the 727 patients, 347 were male (48%), and the mean (SD) age was 48.6 (24.6) years. There were 239 consultations with new patients (33%) and 488 follow-up consultations (67%). The mean (SD) duration of the consultations was 15 (9) minutes, with a minimum of 1 and maximum of 50 minutes.

### OPTION<sup>5</sup> scores

Scores on the 5 items of the OPTION<sup>5</sup> (see supplementary material, Table A) were expressed on a scale ranging from 0 (no SDM) to 20 (optimal SDM) per item. The highest scores were found for item 1 (the consultant draws attention to, or confirms, that alternate management options exist, recognizing the need for a decision; mean (SD) score 5.1 (4.0) (on a 0 to 20 scale) and item 3 (the consultant gives information, or checks understanding, about the reasonable options that are available for the patient, including the choice of 'no action'; mean (SD) score 4.7 (5.0) on a 0 to 20 scale. Intermediate scores were found for item 4 (the consultant elicits the patient's preferred option(s); mean (SD) scores 3.3 (4.4)) and item 5 (the consultant makes an effort to integrate the patient's elicited preferences in the decision-making process; mean (SD) score 2.9 (4.1), each on a 0 to 20 scale. The lowest scores were

1  
2  
3 found for item 2 (the consultant supports the patient to become informed or deliberate about  
4 the options; mean (SD) score of 0.9 (2.4) on a 0 to 20 scale.  
5  
6  
7

8  
9 The mean (SD) total OPTION<sup>5</sup> score for the main decision was 16.8 (17.1) on a scale ranging  
10 from 0 (no SDM) to 100 (optimal SDM). The OPTION<sup>5</sup> scores varied both within and  
11 between consultants, see Figures 1 and 2. Univariate analysis showed that the mean (SD)  
12 OPTION<sup>5</sup> scores on consultations of consultants who reported SDM (18.9 (17.3) on a 0 to  
13 100 scale). as their usual decision-making style were slightly higher than the mean scores on  
14 consultations of consultants who reported an informative (15.6(17.9)) or paternalistic style of  
15 decision making (15.0 (15.8),  $p = 0.017$ ). In an unadjusted multilevel analysis, the reported  
16 usual decision-making style was not related to the OPTION<sup>5</sup> score ( $p > 0.156$ ). After adjusting  
17 for patient, consultant and consultation characteristics, higher OPTION<sup>5</sup> scores were only  
18 significantly related to the category of decisions (treatment versus the other categories) and  
19 longer consultation duration. Table 1 presents the model that best fitted the data. The full  
20 model including all patient and consultant characteristics is presented in the supplementary  
21 material, Table C. This full model showed similar results but provided a poorer overall fit to  
22 the data compared to the model presented in Table 1.  
23  
24  
25  
26  
27  
28  
29  
30  
31  
32  
33  
34  
35  
36  
37  
38  
39  
40  
41  
42

## 43 Discussion

44  
45  
46 Using self-reported statements of usual decision-making style and an independent assessment  
47 of consultants' actual decision-making behaviour in video-recorded consultations we sought  
48 to investigate a potential gap between consultants' perceived and actual decision-making  
49 behaviours in consultations. In a multilevel analysis of our data, the observed degree of  
50 patient involvement in video-recorded consultations was not associated with the consultants'  
51 self-reported usual decision-making style. In other words, the medical consultants in this  
52 study did not do what they said they did in reaching decisions with their patients. Following  
53  
54  
55  
56  
57  
58  
59  
60

1  
2  
3 Broadwell and Maslow's four stages of competence model that is commonly used in the  
4 training of clinical skills,<sup>19</sup> these consultants can be described as "unconsciously  
5 incompetent" in SDM. This is important because they are the role models for medical  
6 students and junior doctors. To be able to demonstrate and teach this crucial communication  
7 skill to medical learners, consultants need to be aware of their role in the decision-making  
8 process and be competent in SDM. To be receptive to SDM training, consultants first need to  
9 be consciously aware of their limited skills in involving patients in treatment decisions  
10 ("conscious incompetence" in Broadwell's and Maslow's model). In our study, only the  
11 consultants who had reported paternalistic decision making as their usual style appeared to be  
12 "consciously incompetent" in the terminology of this model. In addition, the discrepancy  
13 between consultants' self-reported usual decision-making style and the observed patient  
14 involvement in their consultations undermines the validity of SDM research using self-  
15 reported measures.

### 35 Comparison with other studies

36  
37 Patient involvement was limited, with mean OPTION<sup>5</sup> scores below the proposed cut-off  
38 value of 25,<sup>7</sup> which is comparable to several other studies.<sup>9, 20</sup> We found considerable  
39 differences in OPTION<sup>5</sup> scores between consultations of each individual consultant (Figure  
40 2), suggesting that individual consultants' patient involvement behaviour is variable. Further  
41 research is needed to explore the reasons for this variation, which could be related to  
42 physician, patient or organizational factors. Limited patient involvement was associated with  
43 decision type (treatment versus diagnostic or follow-up decisions) and longer consultation  
44 duration (Table 1). The cross-sectional nature of our study did not allow us to identify what  
45 the cause is and what the effect. (Lack of) time is often reported as a key barrier to the  
46 application of SDM in clinical practice.<sup>10, 21-23</sup> The literature on the actual impact of applying  
47  
48  
49  
50  
51  
52  
53  
54  
55  
56  
57  
58  
59  
60



1  
2  
3 SDM on consultation duration is too scant to allow a clear estimation of the effects.<sup>23, 24</sup>

4  
5 Patient and consultant characteristics such as age and gender were not related to the  
6  
7 OPTION<sup>5</sup> scores in the multilevel model (Table 1 and Table C in the supplementary  
8  
9 material). This is in accordance with a systematic review of 33 studies on OPTION<sup>5</sup> scores.<sup>7</sup>

10  
11  
12  
13  
14 The previous literature comparing clinicians' self-reported and actual decision-making style  
15  
16 in medical consultations also showed that clinicians tend to overestimate the extent to which  
17  
18 they apply SDM.<sup>20, 25</sup> These studies analysed simple decisions in primary care such as refills  
19  
20 and routine testing<sup>20</sup> or were performed in specific breast cancer or renal failure clinics in  
21  
22 which the staff had been extensively trained in the application of SDM.<sup>25</sup>

### 23 24 25 26 27 28 Strengths and limitations

29  
30 The main strength of our study was that we combined direct observations of consultants'  
31  
32 SDM behaviour in a large sample of clinical decisions across 18 different disciplines with  
33  
34 their self-reported usual decision-making style. We acknowledge the following limitations of  
35  
36 our study. Firstly, the consultants were aware that their behaviour in the decision-making  
37  
38 process was recorded and assessed, which may have prompted them to show more SDM  
39  
40 behaviour than they otherwise would. However, so far, there is no indication that videotaping  
41  
42 consultations has an effect on clinicians' behaviour.<sup>26, 27</sup> Secondly, the cross-sectional design  
43  
44 of this study precludes causal inference of the associations we observed. Thirdly, it is  
45  
46 possible that we only scored part of the decision-making process if decisions were distributed  
47  
48 over more than one consultation. Our approach to analysis is comparable to that in earlier  
49  
50 studies<sup>7</sup>, so this does not affect comparison of our results to those found in the literature.  
51  
52  
53 Fourthly, our study was performed in a single, large hospital in the Netherlands, which may  
54  
55 have limited the generalizability of our results to other settings and countries. Finally, like in  
56  
57  
58  
59  
60

1  
2  
3 earlier studies using the OPTION5 instrument, our study focused on clinician behaviour and  
4  
5 not on not on patients' experiences. Given the scant literature on the topic,<sup>20, 28, 29</sup> more  
6  
7 studies are needed to assess how patients experience the decision-making process in medical  
8  
9 consultations  
10

### 11 12 13 14 15 Conclusion and practical implications

16  
17 Our study shows that medical consultants are unable to assess their own decision making-  
18  
19 behaviour in medical encounters. This undermines the validity of SDM research using self-  
20  
21 reported measures. Even more importantly, the consultants' unconscious incompetence in  
22  
23 SDM hampers transfer of this crucial communication skill to students and junior doctors. In  
24  
25 addition, consultants' motivation to participate in effective SDM training programs<sup>30-32</sup> is  
26  
27 likely to increase when they are consciously aware of their incompetence in practising SDM.  
28  
29 Our results therefore support the use of video-recorded patient consultations to help  
30  
31 consultants regularly review, reflect on, and increase their awareness of their own decision-  
32  
33 making behaviours. This, in turn, may promote consultants' willingness to participate in  
34  
35 SDM training programs, which is necessary for further implementation of SDM in clinical  
36  
37  
38  
39  
40 practice.  
41  
42  
43  
44  
45  
46  
47  
48  
49  
50  
51  
52  
53  
54  
55  
56  
57  
58  
59  
60

### **Ethics statement**

The study was carried out in accordance with the Declaration of Helsinki and was approved by Isala Hospital's Ethical Review Board (file number 180706). All participants, consultants and patients, provided written informed consent.

### **Transparency statement**

The lead author (the manuscript's guarantor) affirms that the manuscript is an honest, accurate, and transparent account of the study being reported; that no important aspects of the study have been omitted; and that any discrepancies from the study as originally planned (and, if relevant, registered) have been explained.

### **Funding source**

This research was supported by a research grant from the Isala Hospital's Innovation and Research Fund (INO1602), they had no role in the study. We confirm the independence of researchers from funders and that all authors, external and internal, had full access to all of the data (including statistical reports and tables) in the study and can take responsibility for the integrity of the data and the accuracy of the data analysis is also required.

### **Acknowledgement**

We thank the consultants and the patients who participated in this study, and we thank T. Bouwkamp-Timmer for editorial help.

Table 1. Random-intercept regression models for the presence of patient involvement (OPTION<sup>5</sup>) in 727 main decisions in encounters of 41 consultants with 727 patients.

| Variable                    |                          | Final model *    |               | p-value |
|-----------------------------|--------------------------|------------------|---------------|---------|
|                             |                          | Coefficient (SE) |               |         |
| Intercept †                 |                          | 19.17 (0.80)     |               | <0.001  |
| Consultant-level predictors |                          |                  |               |         |
|                             | Self-reported usual role | SDM              | Reference     |         |
|                             | **                       | Paternalistic    | -1.60 (2.84)  | 0.573   |
|                             |                          | Informative      | -1.13 (3.05)  | 0.712   |
| Patient-level predictors    |                          |                  |               |         |
|                             | Decision category        | Treatment        | Reference     |         |
|                             |                          | Diagnostic       | -5.59 (1.50)  | <0.001  |
|                             |                          | Follow-up        | -10.34 (1.75) | <0.001  |
|                             | Consultation duration    | Minutes          | 0.73 (0.07)   | <0.001  |

\* This final model fitted the data best. The model including all patient and consultant characteristics is presented in the supplementary material Table C. This full model showed similar results to the model presented in Table 1, but with lower overall fit.

† Intercept = The intercept can be interpreted as the average patient involvement of a (hypothetical) subject scoring 0 for each predictor in the model.

\*\* Self-reported usual decision-making role in previous study.<sup>11</sup>

1  
2  
3 Figure 1. Mean patient involvement (OPTION<sup>5</sup>) (on a scale 0-100) of 41 medical consultants  
4 (with 727 patients) by self-reported usual decision-making style assessed with modified  
5  
6 Control Preference Scale (CPS): paternalistic, shared and informative decision making.  
7  
8  
9  
10  
11  
12  
13  
14  
15  
16  
17  
18  
19  
20  
21  
22  
23

24 Figure 2. Mean and standard error of the mean of patient involvement (OPTION<sup>5</sup>) scores  
25 (scale 0-100) in consultation of 41 medical consultants (with 727 patients) by self-reported  
26 usual decision-making role: paternalistic, shared or informative decision making.  
27  
28  
29  
30  
31  
32  
33  
34  
35  
36  
37  
38  
39  
40  
41  
42  
43  
44  
45  
46  
47  
48  
49  
50  
51  
52  
53  
54  
55  
56  
57  
58  
59  
60

## References

1. Van der Weijden T, Post H, Brand PLP, et al. Shared decision making, a buzz-word in the Netherlands, the pace quickens towards nationwide implementation. *Z Evid Fortbild Qual Gesundheitswes.* 2017;123-124:69-74.
2. Stiggelbout AM, Pieterse AH, De Haes JC. Shared decision making: Concepts, evidence, and practice. *PatientEducCouns.* 2015;98(10):1172-9.
3. Blumenthal-Barby J, Opel DJ, Dickert NW, et al. Potential Unintended Consequences Of Recent Shared Decision Making Policy Initiatives. *Health Aff (Millwood).* 2019;38(11):1876-81.
4. Harter M, Moumjid N, Cornuz J, et al. Shared decision making in 2017: International accomplishments in policy, research and implementation. *Z Evid Fortbild Qual Gesundheitswes.* 2017;123-124:1-5.
5. Carmona C, Crutwell J, Burnham M, et al. Shared decision-making: summary of NICE guidance. *BMJ.* 2021;373:n1430.
6. Spatz ES, Krumholz HM, Moulton BW. Prime Time for Shared Decision Making. *JAMA.* 2017;317(13):1309-10.
7. Couet N, Desroches S, Robitaille H, et al. Assessments of the extent to which health-care providers involve patients in decision making: a systematic review of studies using the OPTION instrument. *Health Expect.* 2015;18(4):542-61.
8. Agbadje TT, Elidor H, Perin MS, et al. Towards a taxonomy of behavior change techniques for promoting shared decision making. *Implement Sci.* 2020;15(1):67.
9. Meijers MC, Noordman J, Spreeuwenberg P, et al. Shared decision-making in general practice: an observational study comparing 2007 with 2015. *Fam Pract.* 2019;36(3):357-64.
10. Joseph-Williams N, Lloyd A, Edwards A, et al. Implementing shared decision making in the NHS: lessons from the MAGIC programme. *BMJ.* 2017;357:j1744.
11. Driever EM, Stiggelbout AM, Brand PLP. Shared decision making: Physicians' preferred role, usual role and their perception of its key components. *Patient Educ Couns.* 2020;103(1):77-82.
12. Pollard S, Bansback N, Bryan S. Physician attitudes toward shared decision making: A systematic review. *Patient Educ Couns.* 2015;98(9):1046-57.
13. Ericsson KA. Deliberate practice and acquisition of expert performance: a general overview. *Acad Emerg Med.* 2008;15(11):988-94.
14. De Leeuw JME. Introduction to Multilevel Analysis. In: De Leeuw JME, editor. *Handbook of multilevel analysis.* New York, USA: Springer Science + Business Media 2008.
15. Elwyn G, Hutchings H, Edwards A, et al. The OPTION scale: measuring the extent that clinicians involve patients in decision-making tasks. *Health Expect.* 2005;8(1):34-42.
16. Stubenrouch FE, Pieterse AH, Falkenberg R, et al. OPTION(5) versus OPTION(12) instruments to appreciate the extent to which healthcare providers involve patients in decision-making. *Patient Educ Couns.* 2016;99(6):1062-8.
17. Glyn Elwyn SWG, Paul Barr. Observer OPTION-5 Manual. Measuring shared decision making by assessing recordings or transcripts of encounters from clinical settings. : The DartMouth Institute for Health Policy and Clinical Practice; 2018.
18. Dijkstra IS, Pols J, Remmelts P, et al. What are we preparing them for? Development of an inventory of tasks for medical, surgical and supportive specialties. *MedTeach.* 2013;35(4):e1068-e77.
19. Maslow AH. *Motivation and Personality.* 3rd ed. : Harper and Row; 1987.
20. Jackson JL, Storch D, Jackson W, et al. Direct-Observation Cohort Study of Shared Decision Making in a Primary Care Clinic. *Med Decis Making.* 2020;40(6):756-65.

- 1
- 2
- 3
- 4 21. Legare F, Thompson-Leduc P. Twelve myths about shared decision making. *Patient Educ Couns*. 2014;96(3):281-6.
- 5
- 6 22. Pieterse AH, Stiggelbout AM, Montori VM. Shared Decision Making and the Importance of Time. *JAMA*. 2019;322(1):25-6.
- 7
- 8 23. Sondergaard SR, Madsen PH, Hilberg O, et al. The impact of shared decision making on time consumption and clinical decisions. A prospective cohort study. *Patient Educ Couns*. 2020.
- 9
- 10
- 11 24. Dobler CC, Sanchez M, Gionfriddo MR, et al. Impact of decision aids used during clinical encounters on clinician outcomes and consultation length: a systematic review. *BMJ Qual Saf*. 2019;28(6):499-510.
- 12
- 13 25. Williams D, Edwards A, Wood F, et al. Ability of observer and self-report measures to capture shared decision-making in clinical practice in the UK: a mixed-methods study. *BMJ Open*. 2019;9(8):e029485.
- 14
- 15 26. Arborelius E, Timpka T. In what way may videotapes be used to get significant information about the patient-physician relationship? *Med Teach*. 1990;12(2):197-208.
- 16
- 17 27. Pringle M, Stewart-Evans C. Does awareness of being video recorded affect doctors' consultation behaviour? *Br J Gen Pract*. 1990;40(340):455-8.
- 18
- 19 28. Chewning B, Bylund CL, Shah B, et al. Patient preferences for shared decisions: a systematic review. *PatientEducCouns*. 2012;86(1):9-18.
- 20
- 21 29. Tamirisa NP, Goodwin JS, Kandalam A, et al. Patient and physician views of shared decision making in cancer. *Health Expect*. 2017;20(6):1248-53.
- 22
- 23 30. Henselmans I, Brugel SD, de Haes H, et al. Promoting shared decision making in advanced cancer: Development and piloting of a patient communication aid. *Patient Educ Couns*. 2019;102(5):916-23.
- 24
- 25 31. Geiger F, Liethmann K, Reitz D, et al. Efficacy of the doktormitSDM training module in supporting shared decision making - Results from a multicenter double-blind randomized controlled trial. *Patient Educ Couns*. 2017;100(12):2331-8.
- 26
- 27 32. Van Veenendaal H, Voogdt-Pruis H, Ubbink DT, et al. Effect of a multilevel implementation programme on shared decision-making in breast cancer care. *BJS Open*. 2021;5(2).
- 28
- 29
- 30
- 31
- 32
- 33
- 34
- 35
- 36
- 37
- 38
- 39
- 40
- 41
- 42
- 43
- 44
- 45
- 46
- 47
- 48
- 49
- 50
- 51
- 52
- 53
- 54
- 55
- 56
- 57
- 58
- 59
- 60

1  
2  
3  
4  
5  
6  
7  
8  
9  
10  
11  
12  
13  
14  
15  
16  
17  
18  
19  
20  
21  
22  
23  
24  
25  
26  
27  
28  
29  
30  
31  
32  
33  
34  
35  
36  
37  
38  
39  
40  
41  
42  
43  
44  
45  
46  
47  
48  
49  
50  
51  
52  
53  
54  
55  
56  
57  
58  
59  
60

### Usual decision-making style

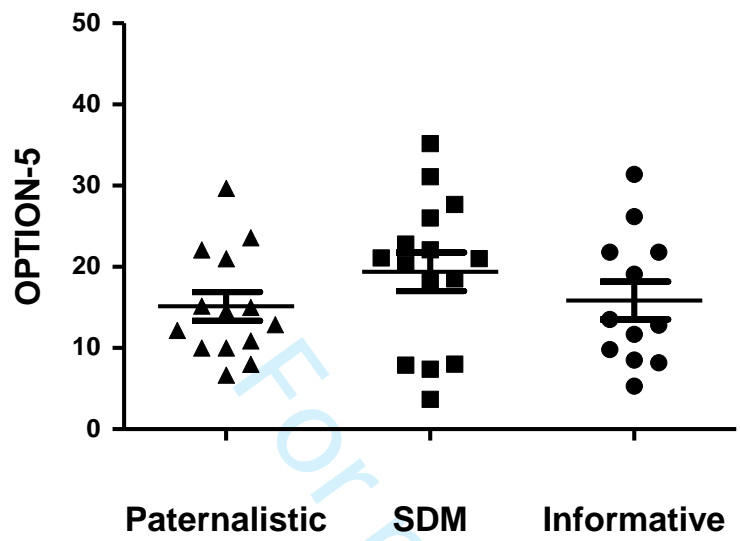



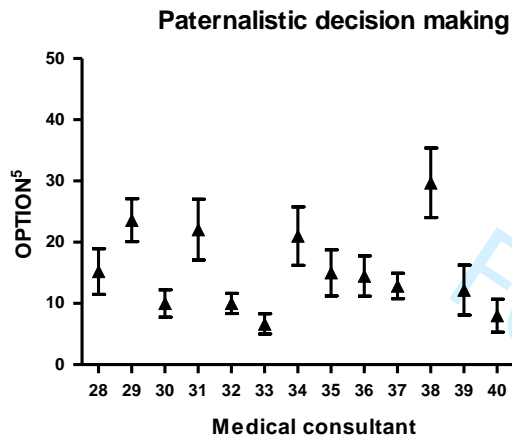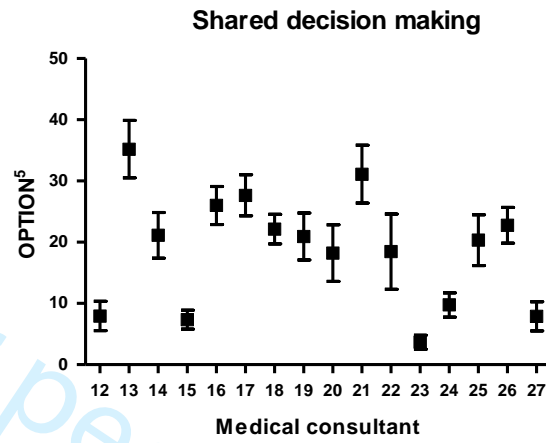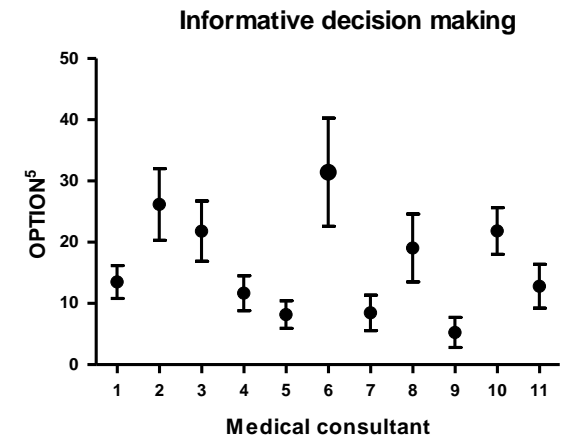

For peer review only

1  
2  
3  
4  
5  
6  
7  
8  
9  
10  
11  
12  
13  
14  
15  
16  
17  
18  
19  
20  
21  
22  
23  
24  
25  
26  
27  
28  
29  
30  
31  
32  
33  
34  
35  
36  
37  
38  
39  
40  
41  
42  
43  
44  
45  
46

Table A. Observing Patient Involvement (OPTION)<sup>5</sup> scale to assess the extent to which physicians involve patients in decision making.<sup>17</sup>

| Item | Content                                                                                                                                                                                                                                                                                                                                         |
|------|-------------------------------------------------------------------------------------------------------------------------------------------------------------------------------------------------------------------------------------------------------------------------------------------------------------------------------------------------|
| 1    | For the health issue being discussed, the clinician draws attention to or confirms that alternate treatment or management options exist or that the need for a decision exists. If the patient rather than the clinician draws attention to the availability of options, the clinician responds by agreeing that the options need deliberation. |
| 2    | The clinician reassures the patient or re-affirms that the clinician will support the patient to become informed or deliberate about the options. If the patient states that they have sought or obtained information prior to the encounter, the clinician supports such a deliberation process.                                               |
| 3    | The clinician gives information or checks understanding about the options that are considered reasonable (this can include taking no action), to support the patient in comparing alternatives. If the patient requests clarification, the clinician supports the process.                                                                      |
| 4    | The clinician makes an effort to elicit the patient's preferences in response to the options that have been described. If the patient declares their preference(s), the clinician is supportive.                                                                                                                                                |
| 5    | The clinician makes an effort to integrate the patient's elicited preferences as decisions are made. If the patient indicates how best to integrate their preferences as decisions are made, the clinician makes an effort to do so.                                                                                                            |

Table B. Participating consultants (n=41) from several specialties (n=18).

|                 |                     |   |
|-----------------|---------------------|---|
| Medical (n=23)  | Internal medicine   | 1 |
|                 | Cardiology          | 1 |
|                 | Paediatric          | 6 |
|                 | Pulmonology         | 2 |
|                 | Gastroenterology    | 2 |
|                 | Neurology           | 3 |
|                 | Radiotherapy        | 2 |
|                 | Rheumatology        | 2 |
|                 | Sport medicine      | 2 |
|                 | Anaesthesiology     | 2 |
| Surgical (n=18) | Surgery             | 1 |
|                 | Gynaecology         | 3 |
|                 | Otolaryngology      | 3 |
|                 | Neurosurgery        | 3 |
|                 | Orthopaedic surgery | 2 |
|                 | Plastic surgery     | 2 |
|                 | Urology             | 2 |
|                 | Ophthalmology       | 2 |

Table C. Random-intercept regression models for the presence of patient involvement (OPTION<sup>5</sup>) in 727 main decisions in encounters of 41 consultants with 727 patients.

| Variable                    |               | Full model* (N=1564)<br>Coefficient (SE) | p-value |
|-----------------------------|---------------|------------------------------------------|---------|
| Intercept†                  |               | 19.17 (2.41)                             | <0.001  |
| Consultant-level predictors |               |                                          |         |
| Reported usual role**       | SDM           | Reference                                |         |
|                             | Paternalistic | -1.37 (2.87)                             | 0.634   |
|                             | Informative   | -1.48 (3.11)                             | 0.633   |
| Age                         | Years         | -0.14 (0.16)                             | 0.383   |
| Gender                      | Male          | Reference                                |         |
|                             | Women         | -3.11 (2.67)                             | 0.243   |
| Discipline                  | Medical       | Reference                                |         |
|                             | Surgical      | 1.89 (2.55)                              | 0.457   |
| Patient-level predictors    |               |                                          |         |
| Age                         | Years         | -0.03 (0.03)                             | 0.270   |
| Gender                      | Male          | Reference                                |         |
|                             | Women         | 0.62 (1.09)                              | 0.569   |
| Type of consultation        | New patient   | Reference                                |         |
|                             | Follow-up     | 0.05 (1.30)                              | 0.969   |
| Time of consultation        | Minutes       | 0.74 (0.08)                              | <0.001  |
| Decision category decision  | Treatment     | Reference                                |         |
|                             | Diagnostic    | -5.61 (1.52)                             | <0.001  |
|                             | Follow-up     | -10.18 (1.75)                            | <0.001  |

\* This full model, with patients' and consultants' characteristics showed similar results to the final model presented in Table 1, but with lower overall fit.

† Intercept = The intercept can be interpreted as the average patient involvement of a (hypothetical) subject scoring 0 for each predictor in the model.

\*\* Self-reported usual decision-making role in previous study.<sup>11</sup>

STROBE Statement—Checklist of items that should be included in reports of *cross-sectional studies*

|                              | Item No | Recommendation                                                                                                                                                                                               | Page No |
|------------------------------|---------|--------------------------------------------------------------------------------------------------------------------------------------------------------------------------------------------------------------|---------|
| <b>Title and abstract</b>    | 1       | (a) Indicate the study's design with a commonly used term in the title or the abstract                                                                                                                       | 1       |
|                              |         | (b) Provide in the abstract an informative and balanced summary of what was done and what was found                                                                                                          | 3-4     |
| <b>Introduction</b>          |         |                                                                                                                                                                                                              |         |
| Background/rationale         | 2       | Explain the scientific background and rationale for the investigation being reported                                                                                                                         | 5       |
| Objectives                   | 3       | State specific objectives, including any prespecified hypotheses                                                                                                                                             | 5-6     |
| <b>Methods</b>               |         |                                                                                                                                                                                                              |         |
| Study design                 | 4       | Present key elements of study design early in the paper                                                                                                                                                      | 6       |
| Setting                      | 5       | Describe the setting, locations, and relevant dates, including periods of recruitment, exposure, follow-up, and data collection                                                                              | 6       |
| Participants                 | 6       | (a) Give the eligibility criteria, and the sources and methods of selection of participants                                                                                                                  | 6       |
| Variables                    | 7       | Clearly define all outcomes, exposures, predictors, potential confounders, and effect modifiers. Give diagnostic criteria, if applicable                                                                     | 6-7     |
| Data sources/<br>measurement | 8*      | For each variable of interest, give sources of data and details of methods of assessment (measurement). Describe comparability of assessment methods if there is more than one group                         | 7-8     |
| Bias                         | 9       | Describe any efforts to address potential sources of bias                                                                                                                                                    | 8       |
| Study size                   | 10      | Explain how the study size was arrived at                                                                                                                                                                    | 6       |
| Quantitative variables       | 11      | Explain how quantitative variables were handled in the analyses. If applicable, describe which groupings were chosen and why                                                                                 | 8       |
| Statistical methods          | 12      | (a) Describe all statistical methods, including those used to control for confounding                                                                                                                        | 8       |
|                              |         | (b) Describe any methods used to examine subgroups and interactions                                                                                                                                          | 8       |
|                              |         | (c) Explain how missing data were addressed                                                                                                                                                                  | 8       |
|                              |         | (d) If applicable, describe analytical methods taking account of sampling strategy                                                                                                                           | 8       |
|                              |         | (e) Describe any sensitivity analyses                                                                                                                                                                        | 8       |
| <b>Results</b>               |         |                                                                                                                                                                                                              |         |
| Participants                 | 13*     | (a) Report numbers of individuals at each stage of study—eg numbers potentially eligible, examined for eligibility, confirmed eligible, included in the study, completing follow-up, and analysed            | 9       |
|                              |         | (b) Give reasons for non-participation at each stage                                                                                                                                                         | -       |
|                              |         | (c) Consider use of a flow diagram                                                                                                                                                                           | -       |
| Descriptive data             | 14*     | (a) Give characteristics of study participants (eg demographic, clinical, social) and information on exposures and potential confounders                                                                     | 9       |
|                              |         | (b) Indicate number of participants with missing data for each variable of interest                                                                                                                          | -       |
| Outcome data                 | 15*     | Report numbers of outcome events or summary measures                                                                                                                                                         | 9       |
| Main results                 | 16      | (a) Give unadjusted estimates and, if applicable, confounder-adjusted estimates and their precision (eg, 95% confidence interval). Make clear which confounders were adjusted for and why they were included | 9-10    |

|                          |    |                                                                                                                                                                            |       |
|--------------------------|----|----------------------------------------------------------------------------------------------------------------------------------------------------------------------------|-------|
|                          |    | (b) Report category boundaries when continuous variables were categorized                                                                                                  | -     |
|                          |    | (c) If relevant, consider translating estimates of relative risk into absolute risk for a meaningful time period                                                           | -     |
| Other analyses           | 17 | Report other analyses done—eg analyses of subgroups and interactions, and sensitivity analyses                                                                             | 10    |
| <b>Discussion</b>        |    |                                                                                                                                                                            |       |
| Key results              | 18 | Summarise key results with reference to study objectives                                                                                                                   | 10-11 |
| Limitations              | 19 | Discuss limitations of the study, taking into account sources of potential bias or imprecision. Discuss both direction and magnitude of any potential bias                 | 12    |
| Interpretation           | 20 | Give a cautious overall interpretation of results considering objectives, limitations, multiplicity of analyses, results from similar studies, and other relevant evidence | 12-13 |
| Generalisability         | 21 | Discuss the generalisability (external validity) of the study results                                                                                                      | 12    |
| <b>Other information</b> |    |                                                                                                                                                                            |       |
| Funding                  | 22 | Give the source of funding and the role of the funders for the present study and, if applicable, for the original study on which the present article is based              | 14    |

\*Give information separately for exposed and unexposed groups.

**Note:** An Explanation and Elaboration article discusses each checklist item and gives methodological background and published examples of transparent reporting. The STROBE checklist is best used in conjunction with this article (freely available on the Web sites of PLoS Medicine at <http://www.plosmedicine.org/>, Annals of Internal Medicine at <http://www.annals.org/>, and Epidemiology at <http://www.epidem.com/>). Information on the STROBE Initiative is available at [www.strobe-statement.org](http://www.strobe-statement.org).
